# Supplementary material
Source: Springer Nature journal article supplement (https://www.springermedizin.de/resource/supplementary/12907_2013_142_MOESM5_ESM.pdf/9524734)
Supplement: MOESM5 [file 9524734]

Table S4. Comparison of VRK1 and VRK2 expression with mutational status in astrocytomas.

|                           | VRK1 EXPRESSION |            |         | VRK2 EXPRESSION |            |         |
|---------------------------|-----------------|------------|---------|-----------------|------------|---------|
|                           | Negative        | Positive   | P-value | Negative        | Positive   | P-value |
| <b>p53 mutation</b>       |                 |            | 0.443   |                 |            | 0.408   |
| -No mutation              | 35 (74.5%)      | 33 (67.3%) |         | 25 (65.8%)      | 42 (73.7%) |         |
| -Mutation                 | 12 (25.5%)      | 16 (32.7%) |         | 13 (34.2%)      | 15 (26.3%) |         |
| <b>IDH1/2 mutation</b>    |                 |            | 0.717   |                 |            | 0.371   |
| -No mutation              | 38 (80.9%)      | 41 (83.7%) |         | 30 (78.9%)      | 49 (86.0%) |         |
| -Mutation                 | 9 (19.1%)       | 8 (16.3%)  |         | 8 (21.1%)       | 8 (14.0%)  |         |
| <b>PTEN Deletion</b>      |                 |            | 0.457   |                 |            | 0.156   |
| -No deletion              | 8 (26.7%)       | 16 (34.8%) |         | 11 (40.7%)      | 12 (25.0%) |         |
| -Deletion                 | 22 (73.3%)      | 30 (65.2%) |         | 16 (59.3%)      | 36 (75.0%) |         |
| <b>EGFR Amplification</b> |                 |            | 0.847   |                 |            | 0.122   |
| -No amplification         | 29 (70.7%)      | 37 (72.5%) |         | 27 (81.8%)      | 38 (66.7%) |         |
| -Amplification            | 12 (29.3%)      | 14 (27.5%) |         | 6 (18.2%)       | 19 (33.3%) |         |
| <b>MGMT methylation</b>   |                 |            | 0.087   |                 |            | 0.504   |
| -No hypermethylation      | 20 (40.8%)      | 29 (58.0%) |         | 17 (44.7%)      | 31 (51.7%) |         |
| -Hypermethylation         | 29 (59.2%)      | 21 (42.0%) |         | 21 (55.3%)      | 29 (48.3%) |         |
